# Supplementary material for: Phase transfer catalyst assisted directly suspended droplet microextraction of platinum from geological and spent automobile converter samples prior to HR-CS AAS determination
Source: Royal Society of Chemistry journal article supplement (doi:10.1039/c3ay40172c), 2013-01-01

## Phase transfer catalyst assisted directly suspended droplet microextraction of platinum from geological and spent automobile converter samples prior to HR-CS AAS determination

### Supporting Information

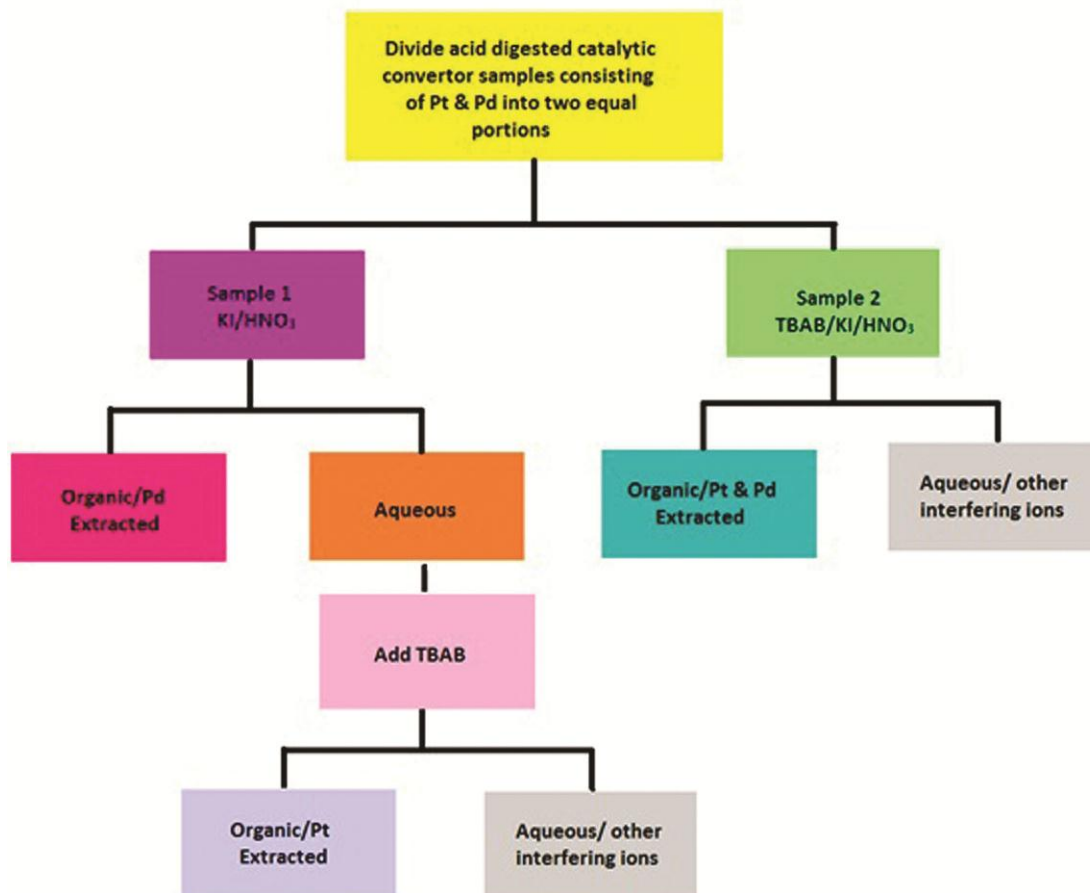

Supplement: c3ay40172c.pdf [file c3ay40172c.pdf]
